# Supplementary material
Source: PubMed Central journal article supplement (PMC2726346)
Supplement: 0901966106_0901966106SI.pdf [file 0901966106_0901966106SI.pdf]

# Supporting Information

Richardson et al. 10.1073/pnas.0901966106

## SI Materials and Methods

**Protein Expression and Purification.** Cultures were grown in Luria-Bertani (LB) media to an  $OD_{600}$  of 1.0, at which point protein expression was induced by addition of isopropyl-beta-D-thiogalactopyranoside (IPTG) to a final concentration of 150  $\mu$ M. Culture growth was continued overnight at 23 °C, after which cells were harvested and resuspended in GST pulldown buffer (50 mM Tris, pH 7.5, 300 mM KCl, 5 mM DTT). The cell suspension was lysed using an EmulsiFlex homogenizer (Avestin) and cleared by centrifugation for 45 min at  $28,000\times g$ . The fusion protein was purified from the cleared lysate by passage over Uniflow glutathione-agarose resin (Clontech), and the GST tag was removed from the eluted protein by thrombin digestion. Final purification was conducted by anion exchange (MonoQ; GE Healthcare) and gel filtration chromatography (S200; GE Healthcare), leaving the protein in a final buffer of 10 mM Tris, pH 7.5, 100 mM KCl, and 2 mM DTT at a concentration, as measured by UV absorbance, of 10 mg/mL. Selenomethionine-substituted Cog4-(525–785) (SeCog4) was purified in the same way, except using *E. coli* strain B834, and with 10 mM DTT added to all buffers.

**Crystallization Structure Determination.** The native crystals used for data collection were grown by hanging drop vapor diffusion in drops containing a 1:1 ratio of protein stock to well buffer (5% PEG-4000, 10 mM ammonium nitrate, 2.5% glycerol, 10 mM DTT). SeCog4-(525–785) crystals were grown by vapor diffusion in hanging drops containing a 1:1 ratio of protein stock to well buffer (4.5% PEG-8000, 8 mM ammonium nitrate, 3% glycerol, 5 mM DTT). Native Cog4-(525–785) crystals were cryoprotected using mother liquor supplemented with 20% (wt/vol) PEG-4000 and 30% (vol/vol) glycerol, while SeCog4-(525–785) crystals were cryoprotected in 30% (vol/vol) glycerol. All crystals were transferred stepwise through intermediate buffers of 2:1 and 1:2 mother liquor:cryoprotectant to minimize osmotic stress on the crystal.

**Quantitative Co-Immunoprecipitation.** Stable *COG4* KD HeLa cells expressing different Cog4-myc mutant constructs for 72 h were lysed on ice in 1 mL DPBST (DPBS, 1% Triton X-100, and

protease inhibitor mixture; Roche Applied Science). Lysates were incubated with 30  $\mu$ L Protein A-Sepharose CL-4B resin, mixed by gentle inversion for 1 h on ice, and centrifuged 10 min at  $20,000\times g$ . Supernatants were transferred to new Eppendorf tubes containing 3  $\mu$ g affinity-purified antibodies against human Cog6 and incubated overnight on ice. After centrifuging as above, 60  $\mu$ L Protein G-Agarose resin (50% slurry) were added to each tube and incubated for 2 h with gentle inversion at 4 °C. The beads were then washed 4 times with TBST, transferred to new Eppendorf tubes, resuspended in 60  $\mu$ L 2 $\times$  SDS/PAGE sample buffer, and heated 5 min at 95 °C to elute bound proteins. Subsequent immunoblotting was performed with anti-Myc and -Cog6 antibodies.

**Analysis of Glycosylation Defects.** For analysis of glycosylation defects, transfected cells were grown in DMEM/F-12 medium supplemented with 15 mM HEPES, 2.5 mM L-glutamine, 10% FBS, and 1  $\mu$ g/mL puromycin for 70 h, after which plasma membranes were stained with Alexa-647-labeled GNL for 30 min on ice (to prevent endocytosis), fixed with 4% paraformaldehyde, and imaged using a Zeiss LSM510 confocal microscope. The resulting images were quantified by manual counting of the percentage of cells stained with GNL ( $n > 100$ ).

**CPY Secretion Assay.** Triplicate 3-day-old single colonies of yeast strains were grown overnight in YPD, back-diluted to an  $OD_{600}$  of 0.1 in fresh YPD, and grown for 6 h at room temperature. The cells were removed by centrifugation and lysed in 0.2 M NaOH, and the remaining media was concentrated 10-fold by trichloroacetate precipitation. The equivalent of 100  $\mu$ L media and 10  $\mu$ L cells were analyzed for CPY by western blotting; band densities were quantified using ImageJ.

**Antibodies.** Antibodies used for western blotting were generated by us or purchased from commercial sources. Antibodies (and their dilutions) were as follows: Rabbit affinity-purified anti-hCog4 (0.8  $\mu$ g/mL; R.S. and V.V.L.), anti-hCog6 (0.5  $\mu$ g/mL; R.S. and V.V.L.), anti-myc (1:10,000; Bethyl Laboratories), mouse monoclonal anti- $\beta$ -actin (1:10,000; Sigma), and anti-CPY (0.5  $\mu$ g/mL; Molecular Probes).

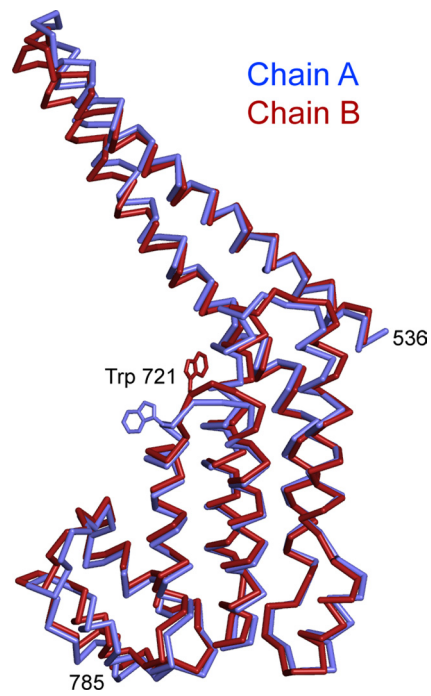

**Fig. S1.** Comparison of the two Cog4-(525–785) monomers composing each crystallographic asymmetric unit. Trp 721, which lies in a crystal contact, is highlighted.

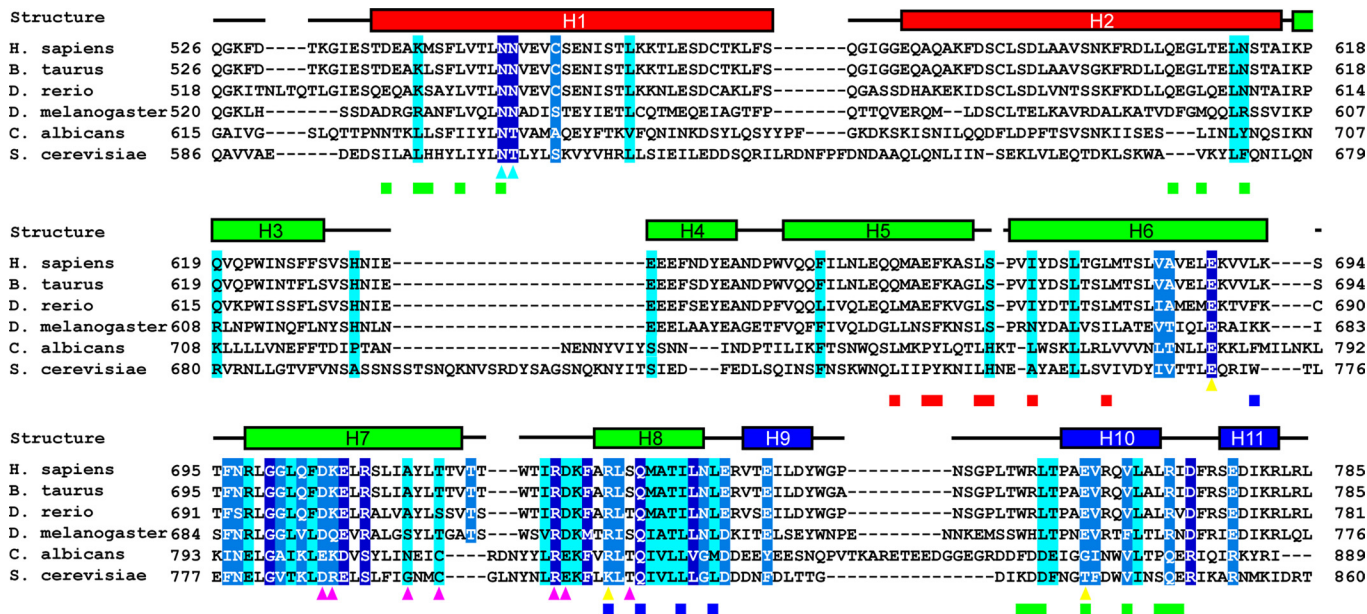

Fig. 52. Multiple sequence alignment of Cog4 homologs. The top 83 PSI-BLAST results from a search using *H. sapiens* Cog4 were aligned using ClustalW; a selection of aligned sequences is shown. Squares below the sequence indicate residues that mediate interdomain contacts; triangles represent residues mutated in Figs. 2 and 3.

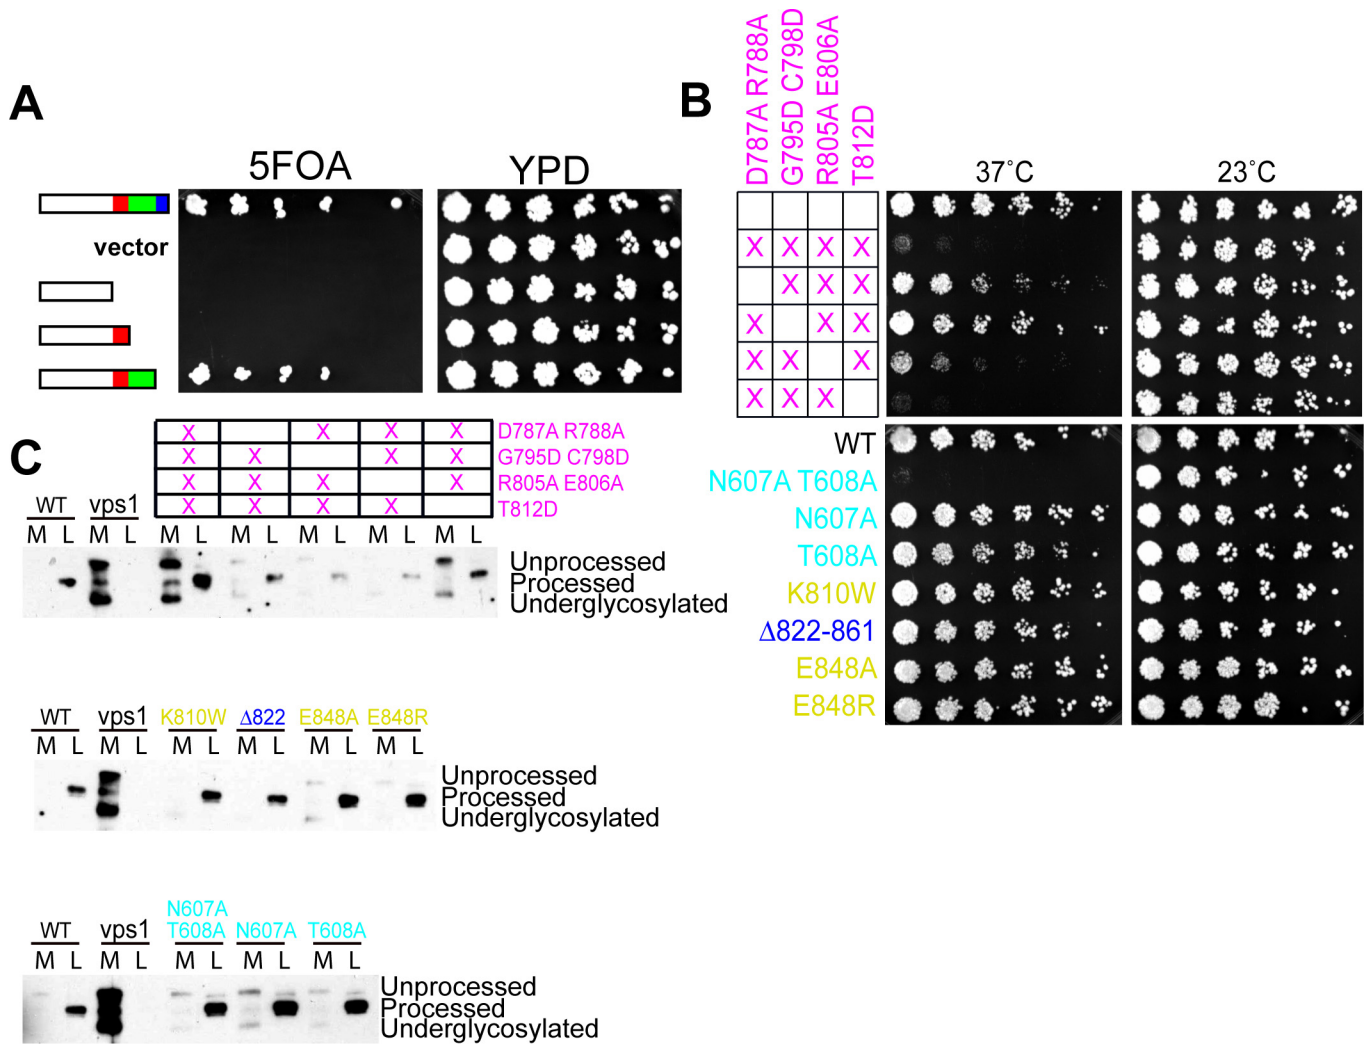

**Fig. S3.** Mutational analysis of Cog4p function in *S. cerevisiae*. (A) Plasmids encoding truncated *S. cerevisiae* Cog4p (represented as in Fig. 2A) were tested for their ability to support growth as the sole source of *COG4* after plating on 5FOA. Color coding is as in Figs. 1 and 2. (B) Cog4p missense mutants were tested for growth defects on YPD at 23 °C and 37 °C. (C) Mislocalization/secretion of CPY was measured by comparing intracellular (cell lysate: L) and extracellular (10-fold concentrated cell-free media: M) pooled triplicate samples by western blotting.

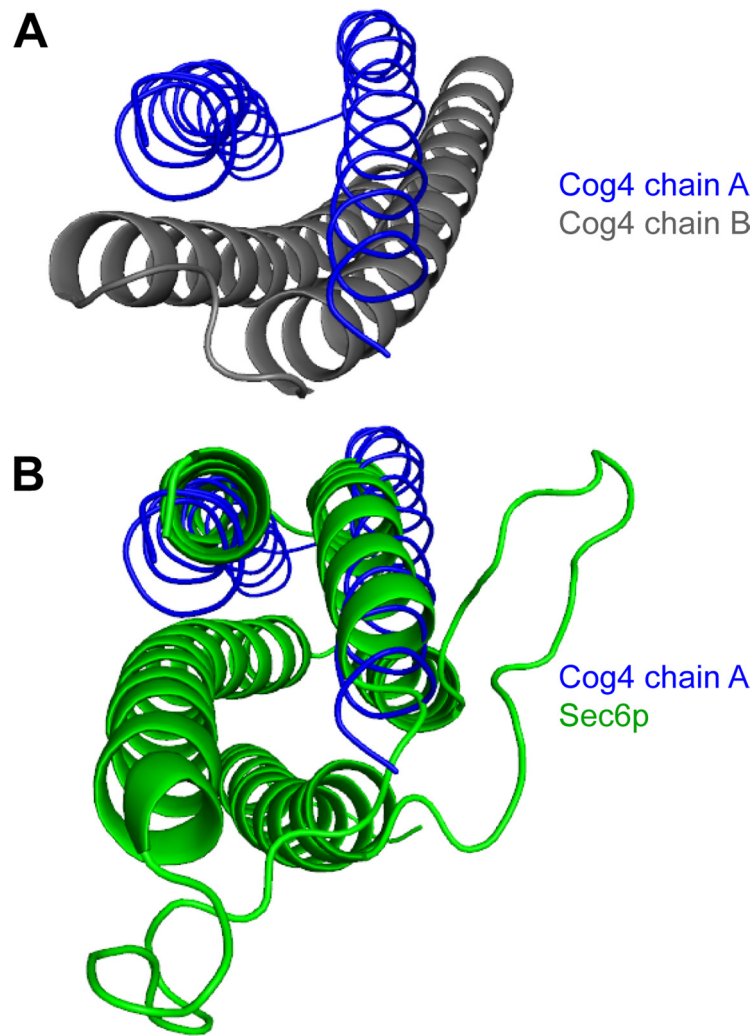

**Fig. S4.** Comparison of the Cog4-(525-785) dimerization interface to the Sec6p structure. (A) End-on view of the Cog4-(525-785) dimer. (B) As in panel A, but with the aligned Sec6p (2FJI, residues 411-805 out of 805) in place of the second (gray) Cog4-(525-785) monomer.

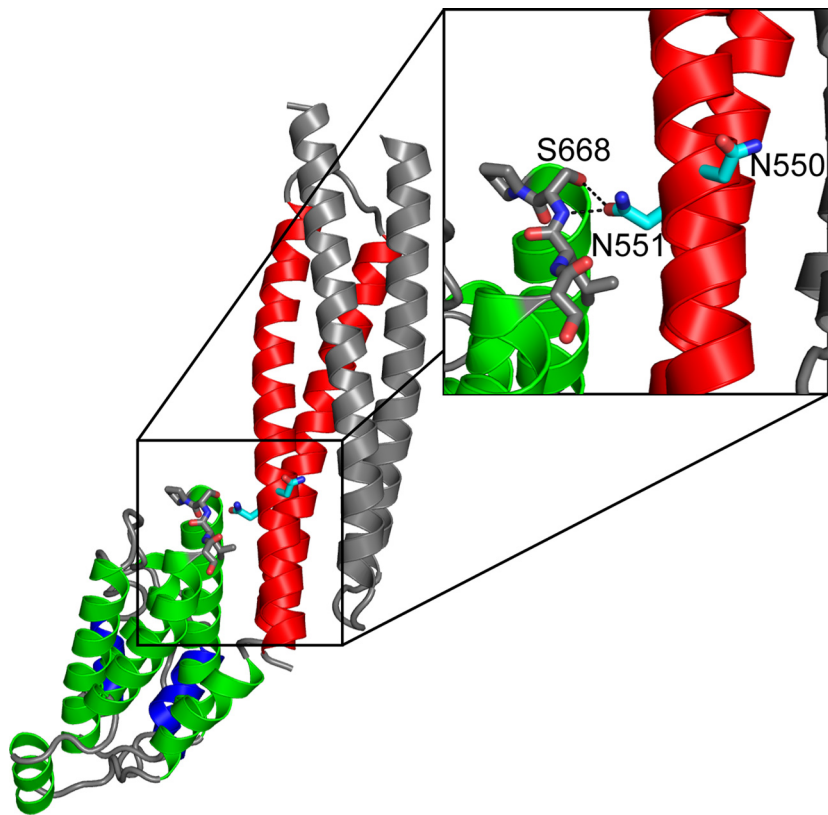

Fig. S5. Interdomain interaction mediated by N551 (human)/T608 (yeast).

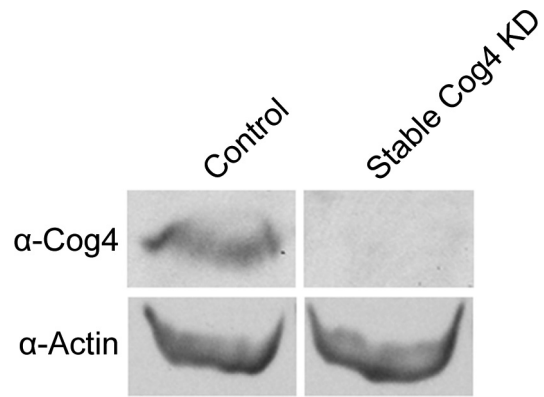

**Fig. S6.** Western blot analysis of Cog4 levels in stable *shCOG4* transfected cells. Proteins from total lysates of parental HeLa T2-GFP cells and no. 39 stable *shCOG4* cells were analyzed by western blotting using antibodies against Cog4 and actin.

Table S1. Phasing and refinement statistics

|                                                  | Native             | SeMet MAD          |                          |                      |
|--------------------------------------------------|--------------------|--------------------|--------------------------|----------------------|
|                                                  |                    | $\lambda 1$ (peak) | $\lambda 2$ (inflection) | $\lambda 3$ (remote) |
| Resolution, Å                                    | 50–1.9 (1.97–1.90) | 50–2.2 (2.28–2.20) | 50–2.2 (2.28–2.20)       | 50–2.2 (2.28–2.20)   |
| Wavelength, Å                                    | 1.0809             | 0.9792             | 0.9794                   | 0.9611               |
| Completeness, %                                  | 99.3 (98.2)        | 99.7 (98.7)        | 99.7 (97.4)              | 99.2 (93.5)          |
| $R_{\text{sym}}$ , %                             | 7.7 (35.7)         | 6.5 (51.4)         | 6.6 (54.8)               | 6.8 (65.6)           |
| Redundancy                                       | 5.4 (5.1)          | 5.3 (3.7)          | 5.3 (3.4)                | 5.2 (2.9)            |
| Total reflections*                               | 406,090            | 491,197            | 492,460                  | 479,448              |
| Unique reflections*                              | 74,854             | 92,779             | 92,872                   | 92,524               |
| $\langle I/\sigma(I) \rangle$                    | 26.5 (3.8)         | 25.7 (2.4)         | 25.2 (2.1)               | 22.9 (1.6)           |
| Space group                                      | $P3_221$           | $P3_221$           | $P3_221$                 | $P3_221$             |
| Unit cell, Å                                     |                    |                    |                          |                      |
| $a = b$                                          | 87.1               | 86.7               | 86.7                     | 86.7                 |
| $c$                                              | 214.8              | 217.7              | 217.7                    | 217.7                |
| MAD phasing                                      |                    |                    |                          |                      |
| Figure of merit                                  |                    |                    | 0.52                     |                      |
| Number of Se sites                               |                    |                    | 10                       |                      |
| Refinement                                       |                    |                    |                          |                      |
| $R_{\text{work}} (R_{\text{free}})$ , %          | 19.4 (22.2)        |                    |                          |                      |
| Reflections in work (free) set                   | 71,032 (3,753)     |                    |                          |                      |
| % reflections set aside for $R_{\text{free}}$    | 5                  |                    |                          |                      |
| Number of atoms                                  |                    |                    |                          |                      |
| All atoms                                        | 4,375              |                    |                          |                      |
| Protein                                          | 3,990              |                    |                          |                      |
| Waters                                           | 393                |                    |                          |                      |
| Average $B$ factor, Å <sup>2</sup>               |                    |                    |                          |                      |
| All atoms                                        | 28.9               |                    |                          |                      |
| rmsd                                             |                    |                    |                          |                      |
| Bond length, Å                                   | 0.013              |                    |                          |                      |
| Bond angle, °                                    | 1.217              |                    |                          |                      |
| B factor across main chain bonds, Å <sup>2</sup> | 2.387              |                    |                          |                      |
| Ramachandran statistics                          |                    |                    |                          |                      |
| Most favored, %                                  | 96.5               |                    |                          |                      |
| Additional allowed, %                            | 3.2                |                    |                          |                      |
| Generously allowed, %                            | 0.2                |                    |                          |                      |

\*The number of reflections is lower in the higher-resolution native dataset due to the treatment of I+ and I- as distinct reflections in the MAD datasets only.



**Table S2. Yeast strains used in this work**

| Strain   | Genotype                                                                                       | Source                        |
|----------|------------------------------------------------------------------------------------------------|-------------------------------|
| MS3128   | MAT a <i>ura3-52 leu2-3,112 his3Δ200 trp1Δ1 vps1::LEU2</i>                                     | M. Rose, Princeton University |
| LY314    | MAT α <i>ura3 leu2 his3 cog4Δ::Gm pNB167 (2 μ, YPT1, URA3)</i>                                 | Lupashin lab (10)             |
| RG25512  | <i>his3Δ1/his3Δ1 leu2Δ0 lleu2Δ0 lys2Δ0/LYS2 MET15/met15Δ0 ura3Δ0 lura3Δ0 COG4/cog4Δ::KanMX</i> | Invitrogen                    |
| BCR13    | <i>his3Δ1 leu2Δ0 lys2Δ0 ura3Δ0 cog4Δ::KanMX pBCR114 (CEN URA3 COG4)</i>                        | This study                    |
| BCR17    | <i>his3Δ1 leu2Δ0 lys2Δ0 ura3Δ0 cog4Δ::KanMX pBCR95 (CEN LEU2 COG4)</i>                         | This study                    |
| BCR19-51 | As pBCR17, with mutant <i>cog4</i> plasmids as indicated in Table 3.                           | This study                    |

Table S3. Summary of phenotypes

| Human mutant                              | Yeast mutant                              | Yeast strain | Yeast growth | Human GNL staining |
|-------------------------------------------|-------------------------------------------|--------------|--------------|--------------------|
| ΔQ525–785                                 | ΔP564–861                                 |              | Lethal       | +                  |
| ΔP618–785                                 | ΔN679–861                                 |              | Lethal       | +                  |
| ΔR741–785                                 | ΔD822–861                                 | BCR19        | WT           | +                  |
| N549A                                     | N607A                                     | BCR51        | WT           |                    |
| N550A                                     | T608A                                     | BCR50        | WT           |                    |
| N549A N550A                               | N607A T608A                               | BCR29        | Ts           | -                  |
| I558D                                     | V616D                                     | BCR37        | WT           |                    |
| V596D                                     | V657D                                     | BCR38        | WT           |                    |
| K664A                                     | K746A                                     | BCR35        | WT           |                    |
| K664E                                     | K746E                                     | BCR36        | WT           |                    |
| E688A                                     |                                           |              |              | -                  |
| K706E                                     | R788E                                     | BCR33        | WT           |                    |
| D705A K706A                               | D787A R788A                               | BCR32        | WT           |                    |
| A713D T716D                               | G795D C798D                               | BCR39        | WT           |                    |
| R724E                                     | R805E                                     | BCR31        | WT           |                    |
| R724A D725A                               | R805A E806A                               | BCR30        | WT           |                    |
| R729A                                     | K810A                                     | BCR21        | WT           | +                  |
| R729W                                     | K810W                                     | BCR41        | WT           | +                  |
| S731D                                     | T812D                                     | BCR40        | WT           |                    |
| E740A                                     | D821A                                     | BCR24        | WT           |                    |
| E764A                                     | E848A                                     | BCR23        | WT           | ++                 |
| E764R                                     | E848R                                     | BCR25        | WT           |                    |
| R729A E764A                               | K810A E848A                               | BCR26        | WT           |                    |
| D774A                                     | D858A                                     | BCR20        | WT           |                    |
| D774R                                     | D858R                                     | BCR22        | WT           |                    |
| E740A D774A                               | D821A D858A                               | BCR28        | WT           |                    |
| E740R D774R                               | D821R D858R                               | BCR27        | WT           |                    |
| D705A K706A A713D T716D R724A D725A S731D | D787A R788A G795D C798D R805A E806A T812D | BCR43        | Ts           |                    |
| A713D T716D R724A D725A S731D             | G795D C798D R805A E806A T812D             | BCR48        | WT           |                    |
| D705A K706A R724A D725A S731D             | D787A R788A R805A E806A T812D             | BCR46        | WT           |                    |
| D705A K706A A713D T716D S731D             | D787A R788A G795D C798D T812D             | BCR42        | WT           |                    |
| D705A K706A A713D T716D R724A D725A       | D787A R788A G795D C798D R805A E806A       | BCR47        | Ts           | -                  |
| A713D T716D R724A D725A                   | G795D C798D R805A E806A                   | BCR44        | WT           |                    |
| R724A D725A S731D                         | R805A E806A T812D                         | BCR45        | WT           |                    |
| D705A K706A R724A D725A                   | D787A R788A R805A E806A                   | BCR49        | WT           |                    |
